# Supplementary material for: Design of a multi-epitope vaccine against SARS-CoV-2: immunoinformatic and computational methods
Source: Royal Society of Chemistry journal article supplement (doi:10.1039/d1ra06532g), 2022-01-01

ARTICLE

## Design of a multi-epitope vaccine against SARS-CoV-2: immunoinformatic and computational methods

Md. Oliullah Rafi, <sup>a,f</sup> Khattab Al-Khafaji, <sup>b</sup> Md. Takim Sarker, <sup>a</sup> Tugba Taskin-Tok, <sup>c,d</sup> Abdus Samad Rana, <sup>e</sup> and Md. Shahedur Rahman, <sup>\*a,f</sup>

<sup>a</sup>*Department of Genetic Engineering and Biotechnology, Jashore University of Science and Technology, Jashore, 7408, Bangladesh*

<sup>b</sup>*Department of Medical Laboratory Technology, AL-Nisour University College, Baghdad, Iraq*

<sup>c</sup>*Department of Bioinformatics and Computational Biology, Institute of Health Sciences, Gaziantep University, Gaziantep 27310, Turkey*

<sup>d</sup>*Faculty of Arts and Sciences, Department of Chemistry, Gaziantep University, Gaziantep, Turkey.*

<sup>e</sup>*School of Biotechnology, Jiangnan University, Wuxi, 214122, PR China*

<sup>f</sup>*Bioinformatics and Microbial Biotechnology Laboratory, Department of Genetic Engineering and Biotechnology, Jashore University of Science and Technology, Jashore 7408, Bangladesh*

### **\*Corresponding Author**

Dr. Md. Shahedur Rahman - Department of Genetic Engineering and Biotechnology, Jashore University of Science and Technology, Jashore 7408, Bangladesh

Email: ms.rahman@just.edu.bd

## SUPPLEMENTARY MATERIALS

### Supplementary Materials SM 1: Primary sequence of the final vaccine construct

MTPQNITDLCAEYHNTQIHTLNDKIFSYTESLAGKREMAIITFKNGATFQVEVPGSQHIDSQKKAIER  
MKDTLRIAYLTEAKVEKLCVWNNKTPHAIAAISMAN**EAAAK**WTAGAAAY**AA**FTISVTTEI**AA**RLD  
PPEAEV**AA**VVFLHVTVV**AA**LLMGCVAET**AA**PYRVVLSF**AA**IAIPTNFTI**AA**FVFLVLLPL**AA**WT  
FGAGAAL**AA**IPNFTISV**AA**LPFNDGVYF**AA**HVSGTNGTK**AA**TLADAGFIK**AA**GVIYFASTEK**GPG**  
**PG**FQTLALHRSYLT**PG**QSIAYTMSLGAENS**GPGPG**SIIAYTMSLGAENSV**GPGPG**IAYTMSLGAEN  
SVAY**GPGPG**NFRVQPTESIVRFPN**GPGPG**IIAYTMSLGAENSV**GPGPG**VVLSFELLHAPATVC**GPGPG**QIPF  
AMQMAYRFNGI**GPGPG**SQSIAYTMSLGAEN**GPGPG**IRAAEIRASANLAAT**GPGPG**RAAEIRASANLAATK

**Bold Text** = Adjuvant

**EAAAK**, **AA**, **GPGPG** = Linkers

9 mer epitopes = CTL epitopes

15 mer epitopes = HTL and IFN- $\gamma$  inducing epitopes

## Supplementary Materials SM 2: Ramachandran plot statistics of the vaccine structure

### Plot statistics

|                                                                                  |      |        |
|----------------------------------------------------------------------------------|------|--------|
| Residues in most favoured regions [A, B, L]                                      | 347  | 86.1%  |
| Residues in additional allowed regions [a,b,l,p]                                 | 46   | 11.4%  |
| Residues in generously allowed regions [ $\sim$ a, $\sim$ b, $\sim$ l, $\sim$ p] | 4    | 1.0%   |
| Residues in disallowed regions                                                   | 6    | 1.5%   |
|                                                                                  | ---- | -----  |
| Number of non-glycine and non-proline residues                                   | 403  | 100.0% |
| Number of end-residues (excl. Gly and Pro)                                       | 2    |        |
| Number of glycine residues (shown as triangles)                                  | 52   |        |
| Number of proline residues                                                       | 37   |        |
|                                                                                  | ---- |        |
| Total number of residues                                                         | 494  |        |

Based on an analysis of 118 structures of resolution of at least 2.0 Angstroms and R-factor no greater than 20%, a good quality model would be expected to have over 90% in the most favoured regions

**Supplementary material SM 3: Physico-chemical properties of the final multi-epitope vaccine construct**

**Number of amino acids:** 494

**Molecular weight:** 51520.82

**Theoretical pI:** 6.46

**Amino acid composition:**

|         |    |       |
|---------|----|-------|
| Ala (A) | 82 | 16.6% |
| Arg (R) | 13 | 2.6%  |
| Asn (N) | 21 | 4.3%  |
| Asp (D) | 7  | 1.4%  |
| Cys (C) | 4  | 0.8%  |
| Gln (Q) | 11 | 2.2%  |
| Glu (E) | 22 | 4.5%  |
| Gly (G) | 52 | 10.5% |
| His (H) | 8  | 1.6%  |
| Ile (I) | 33 | 6.7%  |
| Leu (L) | 32 | 6.5%  |
| Lys (K) | 14 | 2.8%  |
| Met (M) | 12 | 2.4%  |
| Phe (F) | 21 | 4.3%  |
| Pro (P) | 37 | 7.5%  |
| Ser (S) | 28 | 5.7%  |
| Thr (T) | 36 | 7.3%  |
| Trp (W) | 3  | 0.6%  |

Tyr (Y) 30 6.1%

Val (V) 28 5.7%

Pyl (O) 0 0.0%

Sec (U) 0 0.0%

(B) 0 0.0%

(Z) 0 0.0%

(X) 0 0.0%

**Total number of negatively charged residues (Asp + Glu): 29**

**Total number of positively charged residues (Arg + Lys): 27**

**Atomic composition:**

Carbon C 2344

Hydrogen H 3586

Nitrogen N 598

Oxygen O 679

Sulfur S 16

**Formula:** C2344H3586N598O679S16

**Total number of atoms:** 7223

**Extinction coefficients:**

Extinction coefficients are in units of M<sup>-1</sup> cm<sup>-1</sup>, at 280 nm measured in water.

Ext. coefficient 61450

Abs 0.1% (=1 g/l) 1.193, assuming all pairs of Cys residues form cystines

Ext. coefficient 61200

Abs 0.1% (=1 g/l) 1.188, assuming all Cys residues are reduced

### **Estimated half-life:**

The N-terminal of the sequence considered is M (Met).

The estimated half-life is: 30 hours (mammalian reticulocytes, in vitro).

>20 hours (yeast, in vivo).

>10 hours (Escherichia coli, in vivo).

### **Instability index:**

The instability index (II) is computed to be 21.64

This classifies the protein as stable.

**Aliphatic index:** 84.35

**Grand average of hydropathicity (GRAVY):** 0.213

**SUPPLEMENTARY TABLES**

**Supplementary Table S1:** Antigenic and Physiochemical properties of the target spike glycoprotein. The parameters were predicted by ExPASy Proparam tool and VaxiJen v2.0 server.

| <b>PDB ID</b> | <b>Antigenicity (Threshold, 0.4)</b> | <b>Molecular Weight</b> | <b>Instability Index</b> | <b>Aliphatic Index</b> | <b>Theoretical pI</b> | <b>No. of Amino acids</b> | <b>Extinction Co-Efficient</b> | <b>Estimated half-life:</b>                                                                                             | <b>Gravy</b> |
|---------------|--------------------------------------|-------------------------|--------------------------|------------------------|-----------------------|---------------------------|--------------------------------|-------------------------------------------------------------------------------------------------------------------------|--------------|
| 6VSB          | 0.4512                               | 142274.61               | 31.58                    | 81.58                  | 6.14                  | 1288                      | 146845                         | 30 hours (mammalian reticulocytes, in vitro).<br>>20 hours (yeast, in vivo).<br>>10 hours (Escherichia coli, in vivo).  | -0.163       |
| 6VXX          | 0.4587                               | 141410.94               | 31.26                    | 83.32                  | 6.09                  | 1281                      | 138825                         | 30 hours (mammalian reticulocytes, in vitro).<br>>20 hours (yeast, in vivo).<br>>10 hours (Escherichia coli, in vivo).  | -0.139       |
| 6X2A          | 0.4559                               | 140666.66               | 32.08                    | 81.47                  | 6.09                  | 1273                      | 148210                         | 100 hours (mammalian reticulocytes, in vitro).<br>>20 hours (yeast, in vivo).<br>>10 hours (Escherichia coli, in vivo). | -0.181       |
| 6XR8          | 0.4612                               | 144793.24               | 33.38                    | 82.73                  | 6.22                  | 1310                      | 159960                         | 30 hours (mammalian reticulocytes, in vitro).<br>>20 hours (yeast, in vivo).<br>>10 hours (Escherichia coli, in vivo).  | -0.103       |
| 6ZB4          | 0.4517                               | 139612.06               | 31.29                    | 83.61                  | 6.45                  | 1259                      | 142835                         | 30 hours (mammalian reticulocytes, in vitro).<br>>20 hours (yeast, in vivo).<br>>10 hours (Escherichia coli, in vivo).  | -0.145       |
| 6ZGE          | 0.4587                               | 142150.01               | 32.63                    | 84.51                  | 6.04                  | 1287                      | 137335                         | 30 hours (mammalian reticulocytes, in vitro).<br>>20 hours (yeast, in vivo).<br>>10 hours (Escherichia coli, in vivo).  | -0.110       |

|      |        |           |       |       |      |      |        |                                                                                                                        |        |
|------|--------|-----------|-------|-------|------|------|--------|------------------------------------------------------------------------------------------------------------------------|--------|
| 7KDH | 0.4501 | 142307.69 | 31.17 | 81.80 | 6.19 | 1288 | 146845 | 30 hours (mammalian reticulocytes, in vitro).<br>>20 hours (yeast, in vivo).<br>>10 hours (Escherichia coli, in vivo). | -0.160 |
|------|--------|-----------|-------|-------|------|------|--------|------------------------------------------------------------------------------------------------------------------------|--------|

**Supplementary Table S2:** Predicted CTL epitopes. The epitopes were predicted by NetCTL 1.2 server.

| PDB ID | Residue number | Epitope   | Supertypes | Combined Score | Antigenicity | Allergenicity | Immunogenicity |
|--------|----------------|-----------|------------|----------------|--------------|---------------|----------------|
| 6VXX   | 884            | LTDEMIAQY | A1         | 3.6616         | 0.1043       | No            | 0.02           |
| 6VXX   | 277            | WTAGAAAYY | A1         | 3.1128         | 0.6306       | No            | 0.15259        |
| 6VXX   | 765            | STECNLLL  | A1         | 2.3492         | 0.4871       | No            | -0.20478       |
| 6VXX   | 179            | YSSANNCTF | A1         | 1.9531         | -0.1036      | No            | -0.04954       |
| 6VXX   | 181            | SANNCTFEY | A1         | 1.8739         | -0.0924      | No            | 0.13273        |
| 6VXX   | 280            | GAAAYYVGY | A1         | 1.2194         | 0.6604       | No            | 0.09963        |
| 6VXX   | 376            | RISNCVADY | A1         | 1.2032         | -0.5375      | No            | -0.02787       |
| 6VXX   | 834            | RSFIEDLLF | A1         | 0.8441         | -0.5782      | No            | 0.27446        |
| 6VXX   | 391            | ASFSTFKCY | A1         | 0.8085         | 0.2795       | No            | -0.19397       |
| 6VXX   | 1231           | GSGRENLYF | A1         | 0.7939         | 1.0034       | No            | 0.14297        |
| 6VXX   | 647            | QLTPTWRVY | A1         | 0.7887         | 1.2119       | No            | 0.31555        |
| 6VXX   | 102            | VLPFNDGVY | A1         | 0.7675         | 0.4642       | No            | 0.1815         |
| 6VXX   | 1114           | FVSNGTHWF | A1         | 0.7622         | 0.0807       | No            | 0.16605        |
| 6VXX   | 995            | VLNDILSRL | A2         | 1.354          | -0.8524      | No            | 0.03           |
| 6VXX   | 1019           | RLQSLQTYV | A2         | 1.2727         | -0.2167      | No            | -0.29331       |
| 6VXX   | 11             | ALLSLVSLI | A2         | 1.247          | 0.6491       | No            | -0.28811       |
| 6VXX   | 737            | FTISVTTEI | A2         | 1.1808         | 0.8535       | No            | 0.04473        |



|      |      |           |    |        |         |    |          |
|------|------|-----------|----|--------|---------|----|----------|
| 6VXX | 128  | TLDSKTQSL | A2 | 1.0777 | 1.0685  | No | -0.52715 |
| 6VXX | 22   | LLMGCVAET | A2 | 1.0322 | 0.4298  | No | 0.05498  |
| 6VXX | 1079 | VVFLHVTVV | A2 | 1.0304 | 1.5122  | No | 0.1278   |
| 6VXX | 840  | LLFNKVTLA | A2 | 1.0091 | 0.615   | No | -0.11337 |
| 6VXX | 1067 | HLMSFPQSA | A2 | 0.9793 | -0.0681 | No | -0.31433 |
| 6VXX | 901  | ITSGWTFGA | A2 | 0.9541 | 0.4577  | No | 0.35124  |
| 6VXX | 1002 | RLDPPEAEV | A2 | 0.9436 | 0.4496  | No | 0.17101  |
| 6VXX | 221  | KIYSKHTPI | A2 | 0.9329 | 0.7455  | No | -0.32094 |
| 6VXX | 876  | GLTVLPPLL | A2 | 0.9214 | 0.6621  | No | 0.01706  |
| 6VXX | 81   | VTWFHAIHV | A2 | 0.9144 | 0.5426  | No | 0.38925  |
| 6VXX | 934  | VLYENQKLI | A2 | 0.9028 | 0.4361  | No | -0.20427 |
| 6VXX | 805  | KQIYKTPPI | A2 | 0.8755 | 0.2705  | No | -0.14982 |
| 6VXX | 531  | VLSFELLHA | A2 | 0.8218 | 1.0776  | No | 0.1607   |
| 6VXX | 524  | YQPYRVVVL | A2 | 0.8143 | 0.5964  | No | 0.1409   |
| 6VXX | 307  | AVDCALDPL | A2 | 0.8102 | 0.6604  | No | -0.00715 |
| 6VXX | 413  | NVYADSFVI | A2 | 0.7994 | -0.5617 | No | 0.02696  |
| 6VXX | 13   | LSLVSLLSV | A2 | 0.7702 | 1.1681  | No | -0.23962 |
| 6VXX | 753  | TSVDCTMYI | A2 | 0.7648 | 0.7328  | No | -0.1306  |
| 6VXX | 977  | ALNTLVKQL | A2 | 0.7518 | -0.5716 | No | -0.18466 |
| 6VXX | 473  | RLFRKSNLK | A3 | 1.7563 | -0.2829 | No | -0.28759 |
| 6VXX | 108  | GVYFASTEK | A3 | 1.4615 | 0.7112  | No | 0.09023  |
| 6VXX | 60   | KVFRSSVLH | A3 | 1.3419 | -0.6913 | No | -0.19839 |
| 6VXX | 846  | TLADAGFIK | A3 | 1.2451 | 0.5781  | No | 0.28158  |
| 6VXX | 376  | RISNCVADY | A3 | 1.1734 | -0.5375 | No | -0.02787 |
| 6VXX | 88   | HVSGTNGTK | A3 | 1.1575 | 1.0956  | No | 0.06339  |
| 6VXX | 776  | GSFCTQLNR | A3 | 1.0783 | 0.9306  | No | -0.10063 |
| 6VXX | 289  | LQPRTFLLK | A3 | 1.0511 | 0.0371  | No | 0.18064  |
| 6VXX | 428  | QIAPGQTGK | A3 | 1.0483 | 1.8297  | No | -0.02194 |
| 6VXX | 975  | AQALNTLVK | A3 | 1.0252 | -0.2279 | No | 0.04654  |

| 6VXX          | 569                   | GVLTESNKK      | A3                | 0.9827                | 0.8797              | No                   | -0.15423              |
|---------------|-----------------------|----------------|-------------------|-----------------------|---------------------|----------------------|-----------------------|
| 6VXX          | 548                   | KSTNLVKNK      | A3                | 0.9809                | 0.8596              | No                   | -0.15163              |
| 6VXX          | 477                   | KSNLKPFER      | A3                | 0.9792                | 0.949               | No                   | -0.0764               |
| 6VXX          | 994                   | SVLNDILSR      | A3                | 0.9477                | -0.7223             | No                   | 0.03075               |
| 6VXX          | 391                   | ASFSTFKCY      | A3                | 0.8899                | 0.2795              | No                   | -0.19397              |
| 6VXX          | 1266                  | VLLSTFLGH      | A3                | 0.8461                | -0.2415             | No                   | -0.01163              |
| 6VXX          | 181                   | SANNCTFEY      | A3                | 0.8377                | -0.0924             | No                   | 0.13273               |
| 6VXX          | 206                   | KNLREFVFK      | A3                | 0.7504                | -0.5146             | No                   | 0.35942               |
| <b>PDB ID</b> | <b>Residue number</b> | <b>Epitope</b> | <b>Supertypes</b> | <b>Combined Score</b> | <b>Antigenicity</b> | <b>Allergenicity</b> | <b>Immunogenicity</b> |
| 6VSB          | 865                   | LTDEMIAQY      | A1                | 3.6616                | 0.1043              | NO                   | 0.02757               |
| 6VSB          | 258                   | WTAGAAAYY      | A1                | 3.1128                | 0.6306              | NO                   | 0.15259               |
| 6VSB          | 746                   | STECNLLL       | A1                | 2.3492                | 0.4871              | NO                   | -0.20478              |
| 6VSB          | 160                   | YSSANNCTF      | A1                | 1.9531                | -0.1036             | NO                   | -0.04954              |
| 6VSB          | 162                   | SANNCTFEY      | A1                | 1.8739                | -0.0924             | NO                   | 0.13273               |
| 6VSB          | 261                   | GAAAYYVGY      | A1                | 1.2194                | 0.6604              | NO                   | 0.09963               |
| 6VSB          | 357                   | RISNCVADY      | A1                | 1.2032                | -0.5375             | NO                   | -0.02787              |
| 6VSB          | 815                   | RSFIEDLLF      | A1                | 0.8441                | -0.5782             | NO                   | 0.27446               |
| 6VSB          | 372                   | ASFSTFKCY      | A1                | 0.8085                | 0.2795              | NO                   | -0.19397              |
| 6VSB          | 628                   | QLTPTWRVY      | A1                | 0.7887                | 1.2119              | NO                   | 0.31555               |
| 6VSB          | 83                    | VLPFNDGVY      | A1                | 0.7675                | 0.4642              | NO                   | 0.1815                |
| 6VSB          | 1095                  | FVSNNGTHWF     | A1                | 0.7622                | 0.0807              | NO                   | 0.16605               |
| 6VSB          | 976                   | VLNDILSRL      | A2                | 1.354                 | -0.8524             | NO                   | 0.03                  |
| 6VSB          | 1000                  | RLQSLQTYV      | A2                | 1.2727                | -0.2167             | NO                   | -0.29331              |
| 6VSB          | 2                     | FVFLVLLPL      | A2                | 1.1947                | 0.8601              | NO                   | 0.04076               |
| 6VSB          | 718                   | FTISVTTEI      | A2                | 1.1808                | 0.8535              | NO                   | 0.04473               |
| 6VSB          | 1236                  | FLGRSLEVL      | A2                | 1.1019                | 0.6113              | NO                   | 0.00016               |
| 6VSB          | 109                   | TLDSKTQSL      | A2                | 1.0777                | 1.0685              | NO                   | -0.52715              |
| 6VSB          | 1060                  | VVFLHVITYV     | A2                | 1.0304                | 1.5122              | NO                   | 0.1278                |
| 6VSB          | 821                   | LLFNKVTLA      | A2                | 1.0091                | 0.6150              | NO                   | -0.11337              |
| 6VSB          | 1048                  | HLMSFPQSA      | A2                | 0.9793                | -0.0681             | NO                   | -0.31433              |
| 6VSB          | 882                   | ITSGWTFGA      | A2                | 0.9541                | 0.4577              | NO                   | 0.35124               |
| 6VSB          | 983                   | RLDPPEAEV      | A2                | 0.9436                | 0.4496              | NO                   | 0.17101               |

| 6VSB   | 202            | KIYSKHTPI | A2         | 0.9329         | 0.7455       | NO            | -0.32094       |
|--------|----------------|-----------|------------|----------------|--------------|---------------|----------------|
| 6VSB   | 857            | GLTVLPPLL | A2         | 0.9214         | 0.6621       | NO            | 0.01706        |
| 6VSB   | 62             | VTWFHAIHV | A2         | 0.9144         | 0.5426       | NO            | 0.38925        |
| 6VSB   | 915            | VLYENQKLI | A2         | 0.9028         | 0.4361       | NO            | -0.20427       |
| 6VSB   | 786            | KQIYKTPPI | A2         | 0.8755         | 0.2705       | NO            | -0.14982       |
| 6VSB   | 512            | VLSFELLHA | A2         | 0.8218         | 1.0776       | NO            | 0.1607         |
| 6VSB   | 505            | YQPYRVVVL | A2         | 0.8143         | 0.5964       | NO            | 0.1409         |
| 6VSB   | 288            | AVDCALDPL | A2         | 0.8102         | 0.6604       | NO            | -0.00715       |
| 6VSB   | 394            | NVYADSFVI | A2         | 0.7994         | -0.5617      | NO            | 0.02696        |
| 6VSB   | 734            | TSVDCTMYI | A2         | 0.7648         | 0.7328       | NO            | -0.1306        |
| 6VSB   | 958            | ALNTLVKQL | A2         | 0.7518         | -0.5716      | NO            | -0.18466       |
| 6VSB   | 454            | RLFRKSNLK | A3         | 1.7563         | -0.2829      | NO            | -0.28759       |
| 6VSB   | 89             | GVYFASTEK | A3         | 1.4615         | 0.7112       | NO            | 0.09023        |
| 6VSB   | 41             | KVFRSSVLH | A3         | 1.3419         | -0.6913      | NO            | -0.19839       |
| 6VSB   | 1231           | VLLSTFLGR | A3         | 1.2481         | 0.1933       | NO            | -0.01163       |
| 6VSB   | 827            | TLADAGFIK | A3         | 1.2451         | 0.5781       | NO            | 0.28158        |
| 6VSB   | 357            | RISNCVADY | A3         | 1.1734         | -0.5375      | NO            | -0.02787       |
| 6VSB   | 69             | HVSGTNGTK | A3         | 1.1575         | 1.0956       | NO            | 0.06339        |
| 6VSB   | 757            | GSFCTQLNR | A3         | 1.0783         | 0.9306       | NO            | -0.10063       |
| 6VSB   | 270            | LQPRTFLK  | A3         | 1.0511         | 0.0371       | NO            | 0.18064        |
| 6VSB   | 409            | QIAPGQTGK | A3         | 1.0483         | 1.8297       | NO            | -0.02194       |
| 6VSB   | 956            | AQALNTLVK | A3         | 1.0252         | -0.2279      | NO            | 0.04654        |
| 6VSB   | 550            | GVLTESNKK | A3         | 0.9827         | 0.8797       | NO            | -0.15423       |
| 6VSB   | 529            | KSTNLVKNK | A3         | 0.9809         | 0.8596       | NO            | -0.15163       |
| 6VSB   | 458            | KSNLKPFER | A3         | 0.9792         | -0.6565      | NO            | -0.0764        |
| 6VSB   | 975            | SVLNDILSR | A3         | 0.9477         | -0.7223      | NO            | 0.03075        |
| 6VSB   | 372            | ASFSTFKCY | A3         | 0.8899         | 0.2795       | NO            | -0.19397       |
| 6VSB   | 162            | SANNCTFEY | A3         | 0.8377         | -0.0924      | NO            | 0.13273        |
| 6VSB   | 187            | KNLREFVFK | A3         | 0.7504         | -0.5146      | NO            | 0.35942        |
| PDB ID | Residue number | Epitope   | Supertypes | Combined Score | Antigenicity | Allergenicity | Immunogenicity |
| 6X2A   | 850            | LTDEMIAQY | A1         | 3.6616         | 0.1043       | NO            | 0.02757        |
| 6X2A   | 243            | WTAGAAAYY | A1         | 3.1128         | 0.6306       | NO            | 0.15259        |
| 6X2A   | 731            | STECSNLLL | A1         | 2.3492         | 0.4871       | NO            | -0.20478       |

|      |      |            |     |        |         |    |          |
|------|------|------------|-----|--------|---------|----|----------|
| 6X2A | 145  | YSSANNCTF  | A1  | 1.9531 | -0.1036 | NO | -0.04954 |
| 6X2A | 147  | SANNCTFEY  | A1  | 1.8739 | -0.0924 | NO | 0.13273  |
| 6X2A | 246  | GAAAYYVGY  | A1  | 1.2194 | 0.6604  | NO | 0.09963  |
| 6X2A | 342  | RISNCVADY  | A1  | 1.2032 | -0.5375 | NO | -0.02787 |
| 6X2A | 800  | RSFIEDLLF  | A1  | 0.8441 | -0.5782 | NO | 0.27446  |
| 6X2A | 357  | ASFSTFKCY  | A1  | 0.8085 | 0.2795  | NO | -0.19397 |
| 6X2A | 613  | QLTPTWRVY  | A1  | 0.7887 | 1.2119  | NO | 0.31555  |
| 6X2A | 68   | VLPFNDGVY  | A1  | 0.7675 | 0.4642  | NO | 0.1815   |
| 6X2A | 1080 | FVSNGTHWF  | A1  | 0.7622 | 0.0807  | NO | 0.16605  |
| 6X2A | 961  | VLNDILSRL  | A2  | 1.354  | -0.8524 | NO | 0.03     |
| 6X2A | 985  | RLQSLQTYV  | A2  | 1.2727 | -0.2167 | NO | -0.29331 |
| 6X2A | 703  | FTISVTTEI  | A2  | 1.1808 | 0.8535  | NO | 0.04473  |
| 6X2A | 1221 | FLGRSLEVL  | A2  | 1.1019 | 0.6113  | NO | 0.00016  |
| 6X2A | 94   | TLDSKTQSL  | A2  | 1.0777 | 1.0685  | NO | -0.52715 |
| 6X2A | 1045 | VVFLHVITYV | A2  | 1.0304 | 1.5122  | NO | 0.1278   |
| 6X2A | 806  | LLFNKVTLA  | A2  | 1.0091 | 0.615   | NO | -0.11337 |
| 6X2A | 1033 | HLMSFPQSA  | A2  | 0.9793 | -0.0681 | NO | -0.31433 |
| 6X2A | 867  | ITSGWTFGA  | A2  | 0.9541 | 0.4577  | NO | 0.35124  |
| 6X2A | 968  | RLDPPEAEV  | A2  | 0.9436 | 0.4496  | NO | 0.17101  |
| 6X2A | 187  | KIYSKHTPI  | A2  | 0.9329 | 0.7455  | NO | -0.32094 |
| 6X2A | 842  | GLTVLPPLL  | A2  | 0.9148 | 0.6621  | NO | 0.01706  |
| 6X2A | 47   | VTWFHAIHV  | A2  | 0.9144 | 0.5426  | NO | 0.38925  |
| 6X2A | 900  | VLYENQKLI  | A2  | 0.9028 | 0.4361  | NO | -0.20427 |
| 6X2A | 771  | KQIYKTPPI  | A2  | 0.8755 | 0.2705  | NO | -0.14982 |
| 6X2A | 497  | VLSFELLHA  | A2  | 0.8218 | 1.0776  | NO | 0.1607   |
| 6X2A | 490  | YQPYRVVVL  | A2  | 0.8143 | 0.5964  | NO | 0.1409   |
| 6X2A | 273  | AVDCALDPL  | A2  | 0.8102 | 0.6604  | NO | -0.00715 |
| 6X2A | 379  | NVYADSFVI  | A2  | 0.7994 | -0.5617 | NO | 0.02696  |
| 6X2A | 719  | TSVDCTMYI  | A2  | 0.7648 | 0.7328  | NO | -0.1306  |
| 6X2A | 943  | ALNTLVKQL  | A2  | 0.7518 | -0.5716 | NO | -0.18466 |
| 6X2A | 492  | PYRVVLSF   | A24 | 1.8786 | 1.0281  | NO | 0.03138  |
| 6X2A | 154  | EYVSQPFLM  | A24 | 1.7025 | 0.2605  | NO | -0.18399 |
| 6X2A | 297  | IYQTSNFRV  | A24 | 1.6294 | 0.3109  | NO | -0.03669 |

| 6X2A   | 152            | TFEYVSQPF  | A24        | 1.6168         | 0.6641       | NO            | -0.19099       |
|--------|----------------|------------|------------|----------------|--------------|---------------|----------------|
| 6X2A   | 1214           | EWVLLSTFL  | A24        | 1.3414         | 0.4215       | NO            | -0.06313       |
| 6X2A   | 435            | NYLYRLFRK  | A24        | 1.3274         | -0.8611      | NO            | 0.16168        |
| 6X2A   | 129            | YYHKNNKSW  | A24        | 1.2214         | 0.4536       | NO            | -0.49755       |
| 6X2A   | 1122           | VYDPLQPEL  | A24        | 1.1735         | 0.4525       | NO            | -0.07466       |
| 6X2A   | 697            | IAIPTNFTI  | A24        | 1.0788         | 0.7052       | NO            | 0.18523        |
| 6X2A   | 63             | RFDNPVLPF  | A24        | 1.0633         | 0.1828       | NO            | 0.01291        |
| 6X2A   | 740            | QYGSFCTQL  | A24        | 1.0275         | 1.2906       | NO            | -0.12714       |
| 6X2A   | 1086           | HWFVTQRNF  | A24        | 0.9755         | 0.7460       | NO            | 0.0482         |
| 6X2A   | 490            | YQPYRVVVL  | A24        | 0.9003         | 0.5964       | NO            | 0.1409         |
| 6X2A   | 22             | YYPDKVFRS  | A24        | 0.8245         | -0.3237      | NO            | -0.02338       |
| 6X2A   | 145            | YSSANNCTF  | A24        | 0.8021         | -0.1036      | NO            | -0.04954       |
| PDB ID | Residue number | Epitope    | Supertypes | Combined Score | Antigenicity | Allergenicity | Immunogenicity |
| 6XR8   | 865            | LTDEMIAQY  | A1         | 3.6616         | 0.1043       | NO            | 0.02757        |
| 6XR8   | 258            | WTAGAAAYY  | A1         | 3.1128         | 0.6306       | NO            | 0.15259        |
| 6XR8   | 746            | STECSNLLL  | A1         | 2.3492         | 0.4871       | NO            | -0.20478       |
| 6XR8   | 160            | YSSANNCTF  | A1         | 1.9531         | -0.1036      | NO            | -0.04954       |
| 6XR8   | 162            | SANNCTFEY  | A1         | 1.8739         | -0.0924      | NO            | 0.13273        |
| 6XR8   | 261            | GAAAYYVGY  | A1         | 1.2194         | 0.6604       | NO            | 0.09963        |
| 6XR8   | 357            | RISNCVADY  | A1         | 1.2032         | -0.5375      | NO            | -0.02787       |
| 6XR8   | 815            | RSFIEDLLF  | A1         | 0.8441         | -0.5782      | NO            | 0.27446        |
| 6XR8   | 1264           | VLKGVKLHY  | A1         | 0.8253         | 1.2378       | NO            | -0.18916       |
| 6XR8   | 372            | ASFSTFKCY  | A1         | 0.8085         | 0.2795       | NO            | -0.19397       |
| 6XR8   | 628            | QLTPTWRVY  | A1         | 0.7887         | 1.2119       | NO            | 0.31555        |
| 6XR8   | 83             | VLPFNDGVY  | A1         | 0.7675         | 0.4642       | NO            | 0.1815         |
| 6XR8   | 1095           | FVSNNGTHWF | A1         | 0.7622         | 0.0807       | NO            | 0.16605        |
| 6XR8   | 258            | WTAGAAAYY  | A26        | 2.0048         | 0.6306       | NO            | 0.15259        |
| 6XR8   | 1095           | FVSNNGTHWF | A26        | 1.1411         | 0.0807       | NO            | 0.16605        |
| 6XR8   | 1220           | FIAGLIAIV  | A26        | 1.0908         | 0.3162       | NO            | 0.27206        |
| 6XR8   | 1147           | SFKEELDKY  | A26        | 1.0689         | -1.3338      | NO            | 0.01053        |
| 6XR8   | 865            | LTDEMIAQY  | A26        | 1.0671         | 0.1043       | NO            | 0.02757        |
| 6XR8   | 554            | ESNKKFLPF  | A26        | 1.0271         | 1.0278       | NO            | -0.33474       |
| 6XR8   | 2              | FVFLVLLPL  | A26        | 1.0076         | 0.8601       | NO            | 0.04076        |

| 6XR8          | 718                   | FTISVTTEI      | A26               | 1.0014                | 0.8535              | NO                   | 0.04473               |
|---------------|-----------------------|----------------|-------------------|-----------------------|---------------------|----------------------|-----------------------|
| 6XR8          | 886                   | WTFGAGAAL      | A26               | 0.9302                | 0.4918              | NO                   | 0.19798               |
| 6XR8          | 372                   | ASFSTFKCY      | A26               | 0.879                 | 0.2795              | NO                   | -0.19397              |
| 6XR8          | 215                   | DLPQGFSAL      | A26               | 0.862                 | 0.5622              | NO                   | -0.09372              |
| 6XR8          | 603                   | NTSNQVAVL      | A26               | 0.7916                | 0.4987              | NO                   | -0.07701              |
| 6XR8          | 1067                  | YVPAQEKNF      | A26               | 0.7664                | 0.8731              | NO                   | -0.16856              |
| <b>PDB ID</b> | <b>Residue number</b> | <b>Epitope</b> | <b>Supertypes</b> | <b>Combined Score</b> | <b>Antigenicity</b> | <b>Allergenicity</b> | <b>Immunogenicity</b> |
| 6ZB4          | 865                   | LTDEMIAQY      | A1                | 3.6616                | 0.1043              | NO                   | 0.02757               |
| 6ZB4          | 258                   | WTAGAAAYY      | A1                | 3.1128                | 0.6306              | NO                   | 0.15259               |
| 6ZB4          | 746                   | STECNLLL       | A1                | 2.3492                | 0.4871              | NO                   | -0.20478              |
| 6ZB4          | 160                   | YSSANNCTF      | A1                | 1.9531                | -0.1036             | NO                   | -0.04954              |
| 6ZB4          | 162                   | SANNCTFEY      | A1                | 1.8739                | -0.0924             | NO                   | 0.13273               |
| 6ZB4          | 261                   | GAAAYYVGY      | A1                | 1.2194                | 0.6604              | NO                   | 0.09963               |
| 6ZB4          | 357                   | RISNCVADY      | A1                | 1.2032                | -0.5375             | NO                   | -0.02787              |
| 6ZB4          | 815                   | RSFIEDLLF      | A1                | 0.8441                | -0.5782             | NO                   | 0.27446               |
| 6ZB4          | 372                   | ASFSTFKCY      | A1                | 0.8085                | 0.2795              | NO                   | -0.19397              |
| 6ZB4          | 628                   | QLTPTWRVY      | A1                | 0.7887                | 1.2119              | NO                   | 0.31555               |
| 6ZB4          | 83                    | VLPFNDGVY      | A1                | 0.7675                | 0.4642              | NO                   | 0.1815                |
| 6ZB4          | 1095                  | FVSNGTHWF      | A1                | 0.7622                | 0.0807              | NO                   | 0.16605               |
| 6ZB4          | 714                   | IPTNFTISV      | B7                | 1.5427                | 0.882               | NO                   | 0.17229               |
| 6ZB4          | 24                    | LPPAYTNSF      | B7                | 1.5189                | 0.3775              | NO                   | -0.03341              |
| 6ZB4          | 680                   | SPRRAASVA      | B7                | 1.4453                | 0.7227              | NO                   | 0.02831               |
| 6ZB4          | 951                   | VVNQNAQAL      | B7                | 1.1258                | 0.4749              | NO                   | -0.16303              |
| 6ZB4          | 630                   | TPTWRVYST      | B7                | 1.0987                | 0.4605              | NO                   | 0.22497               |
| 6ZB4          | 1014                  | RAAEIRASA      | B7                | 1.0923                | 0.2752              | NO                   | 0.22813               |
| 6ZB4          | 1218                  | VPRGSPGSG      | B7                | 1.0706                | -0.1116             | NO                   | -0.1887               |
| 6ZB4          | 84                    | LPFNDGVYF      | B7                | 1.0427                | 0.5593              | NO                   | 0.11767               |
| 6ZB4          | 411                   | APGQTGKIA      | B7                | 0.9845                | 1.2002              | NO                   | -0.1401               |

| 6ZB4          | 892                   | AALQIPFAM      | B7                | 0.9235                | 0.7747              | NO                   | 0.12066               |
|---------------|-----------------------|----------------|-------------------|-----------------------|---------------------|----------------------|-----------------------|
| 6ZB4          | 1052                  | FPQSAPHGV      | B7                | 0.8956                | -0.0058             | NO                   | -0.12931              |
| 6ZB4          | 462                   | KPFERDIST      | B7                | 0.8646                | -0.4114             | NO                   | 0.22569               |
| 6ZB4          | 262                   | AAAYYVGYL      | B7                | 0.8439                | 0.4605              | NO                   | 0.07068               |
| 6ZB4          | 478                   | TPCNGVEGF      | B7                | 0.8026                | -0.3772             | NO                   | 0.15215               |
| 6ZB4          | 250                   | TPGDSSSGW      | B7                | 0.7709                | 0.133               | NO                   | -0.40333              |
| 6ZB4          | 811                   | KPSKRSFIE      | B7                | 0.7689                | 0.2768              | NO                   | -0.19947              |
| <b>PDB ID</b> | <b>Residue number</b> | <b>Epitope</b> | <b>Supertypes</b> | <b>Combined Score</b> | <b>Antigenicity</b> | <b>Allergenicity</b> | <b>Immunogenicity</b> |
| 6ZGE          | 896                   | LTDEMIAQY      | A1                | 3.6616                | 0.1043              | NO                   | 0.02757               |
| 6ZGE          | 289                   | WTAGAAAYY      | A1                | 3.1128                | 0.6306              | NO                   | 0.15259               |
| 6ZGE          | 777                   | STECNLLL       | A1                | 2.3492                | 0.4871              | NO                   | -0.20478              |
| 6ZGE          | 191                   | YSSANNCTF      | A1                | 1.9531                | -0.1036             | NO                   | -0.04954              |
| 6ZGE          | 193                   | SANNCTFEY      | A1                | 1.8739                | -0.0924             | NO                   | 0.13273               |
| 6ZGE          | 292                   | GAAAYYVGY      | A1                | 1.2194                | 0.6604              | NO                   | 0.09963               |
| 6ZGE          | 388                   | RISNCVADY      | A1                | 1.2032                | -0.5375             | NO                   | -0.02787              |
| 6ZGE          | 846                   | RSFIEDLLF      | A1                | 0.8441                | -0.5782             | NO                   | 0.27446               |
| 6ZGE          | 403                   | ASFSTFKCY      | A1                | 0.8085                | 0.2795              | NO                   | -0.19397              |
| 6ZGE          | 659                   | QLTPTWRVY      | A1                | 0.7887                | 1.2119              | NO                   | 0.31555               |
| 6ZGE          | 114                   | VLPFNDGVY      | A1                | 0.7675                | 0.4642              | NO                   | 0.1815                |
| 6ZGE          | 1126                  | FVSNGTHWF      | A1                | 0.7622                | 0.0807              | NO                   | 0.16605               |
| 6ZGE          | 487                   | FRKSNLKPF      | B8                | 1.395                 | 0.628               | NO                   | -0.44169              |
| 6ZGE          | 536                   | YQPYRVVVL      | B8                | 1.1348                | 0.5964              | NO                   | 0.1409                |
| 6ZGE          | 233                   | KIYSKHTPI      | B8                | 1.124                 | 0.7455              | NO                   | -0.32094              |
| 6ZGE          | 217                   | FKNLREFVF      | B8                | 1.106                 | 0.0523              | NO                   | 0.25431               |
| 6ZGE          | 158                   | VIKVCEFQF      | B8                | 0.9429                | -0.1189             | NO                   | 0.04441               |
| 6ZGE          | 264                   | INTRFQTL       | B8                | 0.8988                | 0.3934              | NO                   | 0.16778               |
| 6ZGE          | 373                   | FNATRFASV      | B8                | 0.8751                | 0.5609              | NO                   | 0.14872               |

| 6ZGE   | 790            | FCTQLNRAL  | B8         | 0.8545         | 0.5159       | NO            | -0.05431       |
|--------|----------------|------------|------------|----------------|--------------|---------------|----------------|
| 6ZGE   | 33             | FVFLVLLPL  | B8         | 0.8252         | 0.8601       | NO            | 0.04076        |
| 6ZGE   | 482            | YLYRLFRKS  | B8         | 0.7972         | -0.6217      | NO            | 0.06796        |
| 6ZGE   | 1065           | LGQSKRVDF  | B8         | 0.7535         | 2.0590       | NO            | -0.31755       |
| PDB ID | Residue number | Epitope    | Supertypes | Combined Score | Antigenicity | Allergenicity | Immunogenicity |
| 7KDH   | 865            | LTDEMIAQY  | A1         | 3.6616         | 0.1043       | No            | 0.02757        |
| 7KDH   | 258            | WTAGAAAYY  | A1         | 3.1128         | 0.6306       | No            | 0.15259        |
| 7KDH   | 746            | STECNLLL   | A1         | 2.3492         | 0.4871       | No            | -0.20478       |
| 7KDH   | 160            | YSSANNCTF  | A1         | 1.9531         | -0.1036      | No            | -0.04954       |
| 7KDH   | 162            | SANNCTFEY  | A1         | 1.8739         | -0.0924      | No            | 0.13273        |
| 7KDH   | 261            | GAAAYYVGY  | A1         | 1.2194         | 0.6604       | No            | 0.09963        |
| 7KDH   | 357            | RISNCVADY  | A1         | 1.2032         | -0.5375      | No            | -0.02787       |
| 7KDH   | 815            | RSFIEDLLF  | A1         | 0.8441         | -0.5782      | No            | 0.27446        |
| 7KDH   | 372            | ASFSTFKCY  | A1         | 0.8085         | 0.2795       | No            | -0.19397       |
| 7KDH   | 628            | QLTPTWRVY  | A1         | 0.7887         | 1.2119       | No            | 0.31555        |
| 7KDH   | 83             | VLPFNDGVY  | A1         | 0.7675         | 0.4642       | No            | 0.1815         |
| 7KDH   | 1095           | FVSNNGTHWF | A1         | 0.7622         | 0.0807       | No            | 0.16605        |
| 7KDH   | 456            | FRKSNLKPF  | B27        | 1.3086         | 0.628        | No            | -0.44169       |
| 7KDH   | 413            | GQTGKIADY  | B27        | 1.0811         | 1.4019       | No            | 0.00796        |
| 7KDH   | 20             | TRTQLPPAY  | B27        | 1.0554         | 1.2923       | No            | -0.1117        |
| 7KDH   | 327            | VRFPNITNL  | B27        | 1.0199         | 1.1141       | No            | 0.1748         |
| 7KDH   | 846            | ARDLICAQK  | B27        | 0.9787         | 0.8157       | No            | 0.04023        |
| 7KDH   | 77             | KRFDNPVLP  | B27        | 0.9728         | 0.2834       | No            | 0.07194        |
| 7KDH   | 1204           | GKYEQSGGY  | B27        | 0.9663         | 0.1691       | No            | -0.10117       |
| 7KDH   | 814            | KRSFIEDLL  | B27        | 0.9131         | -0.6422      | No            | 0.30019        |
| 7KDH   | 956            | AQALNTLVK  | B27        | 0.8298         | -0.2279      | No            | 0.04654        |
| 7KDH   | 443            | SKVGGNYNY  | B27        | 0.7843         | 1.1856       | No            | 0.06751        |
| 7KDH   | 557            | KKFLPFQQF  | B27        | 0.7794         | 0.1647       | No            | -0.0392        |
| 7KDH   | 1106           | QRNFYEPQI  | B27        | 0.7763         | 0.3296       | No            | 0.12931        |
| 7KDH   | 764            | NRALTGIAV  | B27        | 0.7752         | 0.5302       | No            | 0.20642        |



**Supplementary Table S3:** Predicted HTL epitopes. The epitopes were predicted by NetMHC 2 pan 3.2 server.

| <b>Epitope</b>  | <b>PDB ID</b> | <b>Position</b> | <b>Antigenicity</b> | <b>Allergenicity</b> |
|-----------------|---------------|-----------------|---------------------|----------------------|
| FQTLALHRSYLTPG  | 6VSB          | 238             | 0.5789              | no                   |
| NFRVQPTESIVRFPN | 6VSB          | 317             | 0.4307              | no                   |
| NATRFASVYAWNRKR | 6VSB          | 343             | 0.4017              | yes                  |
| ASQSIIAYTMSLGAE | 6VSB          | 688             | 0.5336              | yes                  |
| SQSIIAYTMSLGAEN | 6VSB          | 689             | 0.6141              | yes                  |
| QSIIAYTMSLGAENS | 6VSB          | 690             | 0.5728              | no                   |
| IIAYTMSLGAENSV  | 6VSB          | 692             | 0.5426              | yes                  |
| IAYTMSLGAENSVAY | 6VSB          | 693             | 0.7072              | yes                  |
| <b>Epitope</b>  | <b>PDB ID</b> | <b>Position</b> | <b>Antigenicity</b> | <b>Allergenicity</b> |
| INITRFQTLALHRS  | 6VXX          | 252             | 0.411               | NO                   |
| FQTLALHRSYLTPG  | 6VXX          | 257             | 0.5789              | No                   |
| VVLSFELLHAPATV  | 6VXX          | 529             | 0.8083              | No                   |
| VVLSFELLHAPATVC | 6VXX          | 530             | 0.8618              | No                   |
| SIIAYTMSLGAENSV | 6VXX          | 710             | 0.5691              | No                   |
| IAYTMSLGAENSVAY | 6VXX          | 742             | 0.7072              | No                   |
| <b>Epitope</b>  | <b>PDB ID</b> | <b>Position</b> | <b>Antigenicity</b> | <b>Allergenicity</b> |
| NFRVQPTESIVRFPN | 6X2A          | 302             | 0.4307              | No                   |
| VVLSFELLHAPATV  | 6X2A          | 495             | 0.8083              | No                   |
| VVLSFELLHAPATVC | 6X2A          | 496             | 0.8618              | no                   |
| <b>Epitope</b>  | <b>PDB ID</b> | <b>Position</b> | <b>Antigenicity</b> | <b>Allergenicity</b> |
| NFRVQPTESIVRFPN | 6XR8          | 317             | 0.4307              | no                   |
| NATRFASVYAWNRKR | 6XR8          | 343             | 0.4062              | yes                  |
| TRFASVYAWNRKRIS | 6XR8          | 345             | 0.4963              | yes                  |
| ASQSIIAYTMSLGAE | 6XR8          | 688             | 0.5336              | yes                  |

| SQSIIAYTMSLGAEN | 6XR8          | 689             | 0.6141              | No                   |
|-----------------|---------------|-----------------|---------------------|----------------------|
| QSIIAYTMSLGAENS | 6XR8          | 690             | 0.5728              | no                   |
| SIIAYTMSLGAENSV | 6XR8          | 691             | 0.5691              | yes                  |
| IIAYTMSLGAENSVA | 6XR8          | 692             | 0.5426              | No                   |
| IAYTMSLGAENSVAY | 6XR8          | 693             | 0.7072              | yes                  |
| <b>Epitope</b>  | <b>PDB ID</b> | <b>Position</b> | <b>Antigenicity</b> | <b>Allergenicity</b> |
| VVLSFELLHAPATVC | 6ZB4          | 511             | 0.8618              | No                   |
| VLSFELLHAPATVCG | 6ZB4          | 512             | 0.4784              | No                   |
| QIPFAMQMAYRFNGI | 6ZB4          | 895             | 0.9573              | No                   |
| <b>Epitope</b>  | <b>PDB ID</b> | <b>Position</b> | <b>Antigenicity</b> | <b>Allergenicity</b> |
| AYYVGYLQPRTFLLK | 6ZGE          | 295             | 0.4269              | No                   |
| ASQSIIAYTMSLGAE | 6ZGE          | 719             | 0.5336              | Yes                  |
| SQSIIAYTMSLGAEN | 6ZGE          | 720             | 0.6141              | No                   |
| QSIIAYTMSLGAENS | 6ZGE          | 721             | 0.5728              | No                   |
| IIAYTMSLGAENSVA | 6ZGE          | 723             | 0.5426              | Yes                  |
| <b>Epitope</b>  | <b>PDB ID</b> | <b>Position</b> | <b>Antigenicity</b> | <b>Allergenicity</b> |
| FLPFFSNVTWFHAIH | 7KDH          | 55              | 0.48                | no                   |
| FSNVTWFHAIHVSGT | 7KDH          | 59              | 0.7533              | no                   |
| SNVTWFHAIHVSGTN | 7KDH          | 60              | 0.7067              | yes                  |
| NVTWFHAIHVSGTNG | 7KDH          | 61              | 0.7869              | No                   |
| IRAAEIRASANLAAT | 7KDH          | 1013            | 0.6785              | yes                  |
| RAAEIRASANLAATK | 7KDH          | 1031            | 0.5709              | no                   |

**Supplementary Table S4:** IFN- $\gamma$  epitope prediction for the top HTL epitopes

| S.N | Epitope Name | Sequence        | Method | Results  | Score      |
|-----|--------------|-----------------|--------|----------|------------|
| 1   | Epitope-1    | FQTLALHRSYLTPG  | SVM    | Positive | 0.17464486 |
| 2   | Epitope-2    | QSIIAYTMSLGAENS | MERCI  | Positive | 1          |
| 3   | Epitope-3    | SIIAYTMSLGAENSV | MERCI  | Positive | 1          |
| 4   | Epitope-4    | IAYTMSLGAENSVAY | MERCI  | Positive | 1          |
| 5   | Epitope-5    | NFRVQPTESIVRFPN | MERCI  | Positive | 5          |
| 6   | Epitope-6    | IIAYTMSLGAENSV  | MERCI  | Positive | 1          |
| 7   | Epitope-7    | VVLSFELLHAPATVC | SVM    | Positive | 0.1764     |
| 8   | Epitope-8    | QIPFAMQMAYRFNGI | SVM    | Positive | 0.2388     |
| 9   | Epitope-9    | SQSIIAYTMSLGAEN | SVM    | Positive | 0.051      |
| 10  | Epitope-10   | IRAAEIRASANLAAT | SVM    | Positive | 0.60811745 |
| 11  | Epitope-11   | RAAEIRASANLAATK | SVM    | Positive | 0.21113838 |

**Supplementary Table S5:** Overlapping HTL and CTL epitopes sequences.

| Epitope sequences | HLA class I supertypes (Combined score) and alleles (Percentile rank)                                                                                                                                                                                                                                                                                                            | HLA class II alleles (Binding score%)                                                                                               |
|-------------------|----------------------------------------------------------------------------------------------------------------------------------------------------------------------------------------------------------------------------------------------------------------------------------------------------------------------------------------------------------------------------------|-------------------------------------------------------------------------------------------------------------------------------------|
| FQTLALHRSYLTPG    | A2 (0.7546), A3 (1.0535), B8 (1.4274), B62 (1.3630), HLA-A*02:02 (0.24), HLA-A*80:01 (0.33), HLA-B*08:01(0.4), HLA-B*15:01 (1.4), HLA-A*29:02 (0.63), HLA-A*02:03 (0.64), HLA-B*08:03 (1.54), HLA-A*02:19 (1.12)                                                                                                                                                                 | DRB1*08:01 (1.40), DRB1*10:01 (0.70), DRB1*11:01 (1.40), DRB1*12:01 (1.40), DRB1*13:01 (1.80), DRB1*14:01 (1.50), DRB1*15:01 (0.40) |
| QSIHAYTMSLGAENS   | A2 (1.3674), A26 (1.1502), B7 (0.7513), B62 (0.9574), HLA-A*25:01 (0.38), HLA-A*68:23 (0.68), HLA-A*02:17 (0.715), HLA-A*02:02 (0.77), HLA-B*39:01 (0.8), HLA-B*54:01 (0.9), HLA-B*08:01 (1.0), HLA-A*26:02 (1.195), HLA-A*26:01 (1.25), HLA-A*02:01 (1.4), HLA-A*02:03 (1.45), HLA-A*32:01 (1.5), HLA-A*69:01 (1.75)                                                            | DRB1*01:01 (1.0), DRB1*04:01 (1.0), DRB1*10:01(0.30)                                                                                |
| SIHAYTMSLGAENSV   | A2 (1.3680), A26 (1.1508), B7 (0.7519), B62 (0.9581), HLA-A*25:01 (0.38), HLA-A*69:01 (0.59), HLA-A*68:23 (0.68), HLA-A*02:17 (0.715), HLA-A*02:02 (0.77), HLA-B*39:01 (0.8), HLA-B*54:01 (0.9), HLA-B*08:01 (1.0), HLA-A*26:02 (1.195), HLA-A*26:01 (1.25), HLA-A*02:01 (1.4), HLA-A*02:03 (1.45), HLA-A*32:01 (1.5), HLA-A*68:02 (1.5), HLA-B*57:01 (1.7), HLA-A*69:01 (1.75), | DRB1*01:01 (0.50), DRB1*04:01 (0.70), DRB1*07:01 (1.60), DRB1*10:01 (0.12)                                                          |
| IAYTMSLGAENSVAY   | B62 (1.2841), HLA-B*35:01 (0.3), HLA-A*69:01 (0.59), HLA-A*68:23 (0.68), HLA-B*15:01 (0.8), HLA-B*54:01 (0.9), HLA-A*30:02 (1.305), HLA-A*68:02 (1.5), HLA-B*57:01 (1.7), HLA-A*02:16 (1.8), HLA-A*02:50 (1.9)                                                                                                                                                                   | DRB1*01:01 (0.701), DRB1*04:01 (1.30), DRB1*10:01 (0.17)                                                                            |
| NFRVQPTESIVRFPN   | B7 (0.9927), B27(0.8540), HLA-B*58:02 (0.38), HLA-C*06:02 (0.58), HLA-B*18:01 (0.6), HLA-B*53:01 (0.7), HLA-B*35:03 (0.805), HLA-B*39:01 (1.06), HLA-B*08:03 (1.245), HLA-B*15:03 (1.4), HLA-B*27:05 (1.5), HLA-B*83:01 (1.505), HLA-B*35:01 (1.7), HLA-B*40:01 (1.8)                                                                                                            | DRB1*01:01 (1.90), DRB1*04:01 (0.90)                                                                                                |
| IIAYTMSLGAENSVVA  | HLA-A*69:01 (0.59), HLA-A*68:23 (0.68), HLA-B*54:01 (0.9), HLA-A*68:02 (1.5), HLA-B*57:01 (1.7), HLA-A*02:16 (1.8), HLA-A*02:50 (1.9)                                                                                                                                                                                                                                            | DRB1*01:01 0.40), DRB1*04:01 (0.6), DRB1*07:01 (2), DRB1*10:01 (0.80)                                                               |
| VVLSFELLHAPATVC   | A2 (0.7895), HLA-B*40:02 (0.18), HLA-A*69:01 (0.225), HLA-A*02:19 (0.25), HLA-A*80:01 (0.37), HLA-B*15:42 (0.4), HLA-A*02:16 (0.535), HLA-A*02:03 (0.825), HLA-B*45:01 (1.105), HLA-B*18:01 (1.205), HLA-A*02:11 (1.345), HLA-A*29:02 (1.495), HLA-B*14:02 (1.555)                                                                                                               | DRB1*01:01 (0.40), DRB1*04:01 (0.6), DRB1*10:01 (0.50)                                                                              |
| QIPFAMQMAYRFNGI   | A2(0.7998), B8(0.7829), B58(1.6030), B62 (0.9065), HLA-B*40:02 (0.18), HLA-A*69:01(0.225), HLA-A*02:19 (0.25), HLA-A*80:01 (0.37), HLA-B*15:42 (0.4), HLA-A*02:16 (0.535), HLA-A*02:03 (0.825), HLA-B*45:01 (1.105), HLA-B*18:01 (1.205), HLA-A*02:11 (1.345), HLA-B*54:01 (1.5), HLA-A*02:12 (1.53), HLA-B*14:02 (1.55)                                                         | DRB1*01:01(1.0), DRB1*10:01 (0.90), DRB1*14:01 (0.80), DRB1*15:01 (1.15)                                                            |

|                 |                                                                                                                                                                                                                                     |                                                               |
|-----------------|-------------------------------------------------------------------------------------------------------------------------------------------------------------------------------------------------------------------------------------|---------------------------------------------------------------|
| SQSIAYTMSLGAEN  | A2 (1.3688), A26(1.151), B7(0.7526), B62(1.0372), HLA-A*25:01 (0.38), HLA-B*40:13 (0.44), HLA-A*32:07 (0.495), HLA-B*39:01 (0.5), HLA-A*68:23 (0.68), HLA-A*02:17 (0.715), HLA-A*02:01 (1.4), HLA-B*15:01 (1.4), HLA-A*26:01 (1.25) | DRB1*01:01 (1.10),<br>DRB1*07:01 (2)                          |
| IRAAEIRASANLAAT | B7 (1.0878), B44 (1.8004), HLA-B*40:01 (0.115), HLA-B*44:03 (0.195), HLA-B*44:02 (0.22), HLA-B*40:02 (0.355), HLA-B*07:02 (0.77), HLA-B*14:02 (1.0), HLA-B*45:01 (1.275), HLA-B*73:01 (1.45)                                        | DRB1*04:01 (1.40),<br>DRB1*08:01 (1.20),<br>DRB1*13:02 (1.90) |
| RAAEIRASANLAATK | A3 (1.2429), B7 (1.0763), B44 (1.8005), HLA-B*40:01 (0.115), HLA-B*44:03 (0.195), HLA-B*44:02 (0.22), HLA-B*40:02 (0.355), HLA-B*07:02 (0.7), HLA-A*03:01 (0.9), HLA-B*45:01 (1.275), HLA-B*73:01 (1.44)                            | DRB1*04:01 (0.70),<br>DRB1*08:01 (0.90),<br>DRB1*13:02 (1.30) |

**Supplementary Table S6:** Allergenicity and Toxicity profile of selected epitope included in the vaccine construct.

| Epitope sequence | Allergenicity  |                  | Toxicity  |
|------------------|----------------|------------------|-----------|
|                  | AllerTOP v.2.0 | AllergenFP v.1.0 | ToxinPred |
| WTAGAAAYY        | NON-ALLERGEN   | NON-ALLERGEN     | Non-Toxin |
| FTISVTTEI        | NON-ALLERGEN   | NON-ALLERGEN     | Non-Toxin |
| RLDPPEAEV        | NON-ALLERGEN   | NON-ALLERGEN     | Non-Toxin |
| VVFLHVITYV       | NON-ALLERGEN   | NON-ALLERGEN     | Non-Toxin |
| LLMGCVAET        | NON-ALLERGEN   | NON-ALLERGEN     | Non-Toxin |
| PYRVVLSF         | NON-ALLERGEN   | NON-ALLERGEN     | Non-Toxin |
| IAIPTNFTI        | NON-ALLERGEN   | NON-ALLERGEN     | Non-Toxin |
| FVFLVLLPL        | NON-ALLERGEN   | NON-ALLERGEN     | Non-Toxin |
| WTFGAGAAL        | NON-ALLERGEN   | NON-ALLERGEN     | Non-Toxin |
| IPTNFTISV        | NON-ALLERGEN   | NON-ALLERGEN     | Non-Toxin |
| LPFNDGVYF        | NON-ALLERGEN   | NON-ALLERGEN     | Non-Toxin |
| HVSGTNGTK        | NON-ALLERGEN   | NON-ALLERGEN     | Non-Toxin |
| TLADAGFIK        | NON-ALLERGEN   | NON-ALLERGEN     | Non-Toxin |
| GVYFASTEK        | NON-ALLERGEN   | NON-ALLERGEN     | Non-Toxin |
| FQTLALHRSYLTPG   | NON-ALLERGEN   | NON-ALLERGEN     | Non-Toxin |
| QSIIAYTMSLGAENS  | NON-ALLERGEN   | NON-ALLERGEN     | Non-Toxin |
| SIIAYTMSLGAENSV  | NON-ALLERGEN   | NON-ALLERGEN     | Non-Toxin |
| IAYTMSLGAENSVAY  | NON-ALLERGEN   | NON-ALLERGEN     | Non-Toxin |
| NFRVQPTESIVRFPN  | NON-ALLERGEN   | NON-ALLERGEN     | Non-Toxin |
| IIAYTMSLGAENSVA  | NON-ALLERGEN   | NON-ALLERGEN     | Non-Toxin |
| VVLSFELLHAPATVC  | NON-ALLERGEN   | NON-ALLERGEN     | Non-Toxin |
| QIPFAMQMAYRFNGI  | NON-ALLERGEN   | NON-ALLERGEN     | Non-Toxin |

|                 |              |              |           |
|-----------------|--------------|--------------|-----------|
|                 |              |              |           |
| SQIIAYTMSLGAEN  | NON-ALLERGEN | NON-ALLERGEN | Non-Toxin |
| IRAAEIRASANLAAT | NON-ALLERGEN | NON-ALLERGEN | Non-Toxin |
| RAAEIRASANLAATK | NON-ALLERGEN | NON-ALLERGEN | Non-Toxin |

**Supplementary Table S7:** Refined best vaccine structures. The Refinement was performed by using Galaxy refine web server

| <b>Model</b> | <b>GDT-HA</b> | <b>RMSD</b> | <b>MolProbity</b> | <b>Clash score</b> | <b>Poor rotamers</b> | <b>Rama favored</b> |
|--------------|---------------|-------------|-------------------|--------------------|----------------------|---------------------|
| Initial      | 1.0000        | 0.000       | 3.318             | 100.1              | 1.9                  | 86.4                |
| MODEL 1      | 0.9393        | 0.434       | 2.357             | 21.6               | 0.8                  | 90.7                |
| MODEL 2      | 0.9433        | 0.439       | 2.369             | 21.3               | 0.8                  | 90.0                |
| MODEL 3      | 0.9357        | 0.450       | 2.379             | 22.1               | 0.8                  | 90.2                |
| MODEL 4      | 0.9388        | 0.433       | 2.423             | 25.0               | 0.8                  | 90.4                |
| MODEL 5      | 0.9337        | 0.441       | 2.366             | 21.4               | 0.6                  | 90.2                |



**Supplementary Table S8: Cluster scores of docked vaccine TLR2 complex**

| <b>Cluster (Docked complexes)</b> | <b>Representative</b> | <b>Weighted Score</b> |
|-----------------------------------|-----------------------|-----------------------|
| <b>0</b>                          | Center                | -1012.7               |
|                                   | Lowest Energy         | -1012.7               |
| <b>1</b>                          | Center                | -775.8                |
|                                   | Lowest Energy         | -886.0                |
| <b>2</b>                          | Center                | -872.1                |
|                                   | Lowest Energy         | -1031.0               |
| <b>3</b>                          | Center                | -847.5                |
|                                   | Lowest Energy         | -889.9                |
| <b>4</b>                          | Center                | -772.9                |
|                                   | Lowest Energy         | -898.1                |
| <b>5</b>                          | Center                | -827.4                |
|                                   | Lowest Energy         | -867.8                |
| <b>6</b>                          | Center                | -976.1                |
|                                   | Lowest Energy         | -976.1                |
| <b>7</b>                          | Center                | -753.4                |
|                                   | Lowest Energy         | -1055.1               |
| <b>8</b>                          | Center                | -827.8                |
|                                   | Lowest Energy         | -859.6                |
| <b>9</b>                          | Center                | -937.5                |

| <b>Cluster (Docked complexes)</b> | <b>Representative</b> | <b>Weighted Score</b> |
|-----------------------------------|-----------------------|-----------------------|
|                                   | Lowest Energy         | -937.5                |
| <b>10</b>                         | Center                | -847.5                |
|                                   | Lowest Energy         | -847.5                |
| <b>11</b>                         | Center                | -879.8                |
|                                   | Lowest Energy         | -879.8                |
| <b>12</b>                         | Center                | -879.6                |
|                                   | Lowest Energy         | -879.6                |
| <b>13</b>                         | Center                | -863.7                |
|                                   | Lowest Energy         | -863.7                |
| <b>14</b>                         | Center                | -848.0                |
|                                   | Lowest Energy         | -860.2                |
| <b>15</b>                         | Center                | -773.5                |
|                                   | Lowest Energy         | -834.3                |
| <b>16</b>                         | Center                | -863.5                |
|                                   | Lowest Energy         | -863.5                |
| <b>17</b>                         | Center                | -932.7                |
|                                   | Lowest Energy         | -932.7                |
| <b>18</b>                         | Center                | -894.8                |
|                                   | Lowest Energy         | -894.8                |
| <b>19</b>                         | Center                | -893.2                |

| <b>Cluster (Docked complexes)</b> | <b>Representative</b> | <b>Weighted Score</b> |
|-----------------------------------|-----------------------|-----------------------|
|                                   | Lowest Energy         | -893.2                |
| <b>20</b>                         | Center                | -860.8                |
|                                   | Lowest Energy         | -860.8                |
| <b>21</b>                         | Center                | -789.5                |
|                                   | Lowest Energy         | -837.3                |
| <b>22</b>                         | Center                | -839.0                |
|                                   | Lowest Energy         | -839.0                |
| <b>23</b>                         | Center                | -797.1                |
|                                   | Lowest Energy         | -797.1                |
| <b>24</b>                         | Center                | -766.5                |
|                                   | Lowest Energy         | -830.7                |
| <b>25</b>                         | Center                | -912.3                |
|                                   | Lowest Energy         | -912.3                |
| <b>26</b>                         | Center                | -755.2                |
|                                   | Lowest Energy         | -791.4                |
| <b>27</b>                         | Center                | -840.7                |
|                                   | Lowest Energy         | -840.7                |
| <b>28</b>                         | Center                | -757.4                |
|                                   | Lowest Energy         | -761.4                |

**Supplementary Table S9: Cluster scores of docked vaccine TLR4 complex**

| <b>Cluster (Docked complexes)</b> | <b>Representative</b> | <b>Weighted Score</b> |
|-----------------------------------|-----------------------|-----------------------|
| <b>0</b>                          | Center                | -921.0                |
|                                   | Lowest Energy         | -953.7                |
| <b>1</b>                          | Center                | -897.2                |
|                                   | Lowest Energy         | -953.0                |
| <b>2</b>                          | Center                | -831.3                |
|                                   | Lowest Energy         | -998.3                |
| <b>3</b>                          | Center                | -902.8                |
|                                   | Lowest Energy         | -972.8                |
| <b>4</b>                          | Center                | -855.7                |
|                                   | Lowest Energy         | -958.5                |
| <b>5</b>                          | Center                | -993.4                |
|                                   | Lowest Energy         | -1010.5               |
| <b>6</b>                          | Center                | -864.3                |
|                                   | Lowest Energy         | -906.9                |
| <b>7</b>                          | Center                | -910.9                |
|                                   | Lowest Energy         | -910.9                |
| <b>8</b>                          | Center                | -995.4                |
|                                   | Lowest Energy         | -995.4                |
| <b>9</b>                          | Center                | -826.5                |

| <b>Cluster (Docked complexes)</b> | <b>Representative</b> | <b>Weighted Score</b> |
|-----------------------------------|-----------------------|-----------------------|
|                                   | Lowest Energy         | -919.5                |
| <b>10</b>                         | Center                | -977.7                |
|                                   | Lowest Energy         | -997.0                |
| <b>11</b>                         | Center                | -864.9                |
|                                   | Lowest Energy         | -880.0                |
| <b>12</b>                         | Center                | -838.8                |
|                                   | Lowest Energy         | -870.3                |
| <b>13</b>                         | Center                | -868.7                |
|                                   | Lowest Energy         | -985.4                |
| <b>14</b>                         | Center                | -845.0                |
|                                   | Lowest Energy         | -1009.4               |
| <b>15</b>                         | Center                | -1048.7               |
|                                   | Lowest Energy         | -1066.6               |
| <b>16</b>                         | Center                | -935.5                |
|                                   | Lowest Energy         | -962.0                |
| <b>17</b>                         | Center                | -908.0                |
|                                   | Lowest Energy         | -908.0                |
| <b>18</b>                         | Center                | -952.1                |
|                                   | Lowest Energy         | -1037.5               |
| <b>19</b>                         | Center                | -816.3                |

| <b>Cluster (Docked complexes)</b> | <b>Representative</b> | <b>Weighted Score</b> |
|-----------------------------------|-----------------------|-----------------------|
|                                   | Lowest Energy         | -923.8                |
| <b>20</b>                         | Center                | -871.2                |
|                                   | Lowest Energy         | -1056.9               |
| <b>21</b>                         | Center                | -1010.1               |
|                                   | Lowest Energy         | -1094.1               |
| <b>22</b>                         | Center                | -910.1                |
|                                   | Lowest Energy         | -953.1                |
| <b>23</b>                         | Center                | -890.9                |
|                                   | Lowest Energy         | -1008.7               |
| <b>24</b>                         | Center                | -865.0                |
|                                   | Lowest Energy         | -964.3                |
| <b>25</b>                         | Center                | -825.7                |
|                                   | Lowest Energy         | -910.6                |
| <b>26</b>                         | Center                | -841.9                |
|                                   | Lowest Energy         | -910.4                |
| <b>27</b>                         | Center                | -1034.3               |
|                                   | Lowest Energy         | -1034.3               |
| <b>28</b>                         | Center                | -935.2                |
|                                   | Lowest Energy         | -1129.7               |
| <b>29</b>                         | Center                | -898.3                |

| Cluster (Docked complexes) | Representative | Weighted Score |
|----------------------------|----------------|----------------|
|                            | Lowest Energy  | -948.6         |





**Figure S2:** Phylogenetic relationship of seven spike glycoproteins of SARS-CoV-2 included in the study. The tree was constructed through the Maximum likelihood method with 1000 bootstrap replicates by using MEGA-X

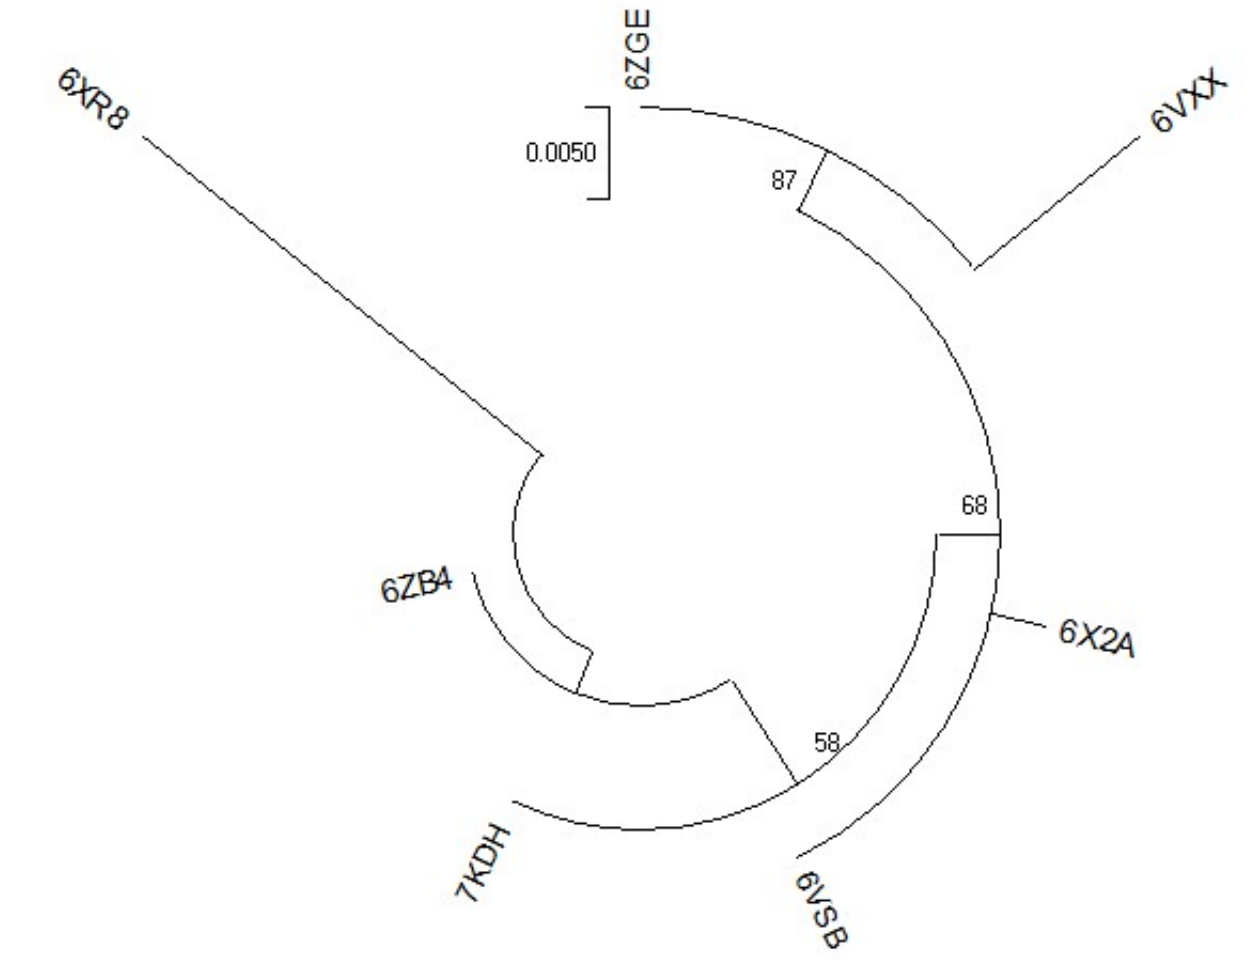

**Figure S3:** Antigenic and immunogenic assessment of cytotoxic T-lymphocyte epitopes. The bar plot represents the antigenicity and immunogenicity score of each epitope.

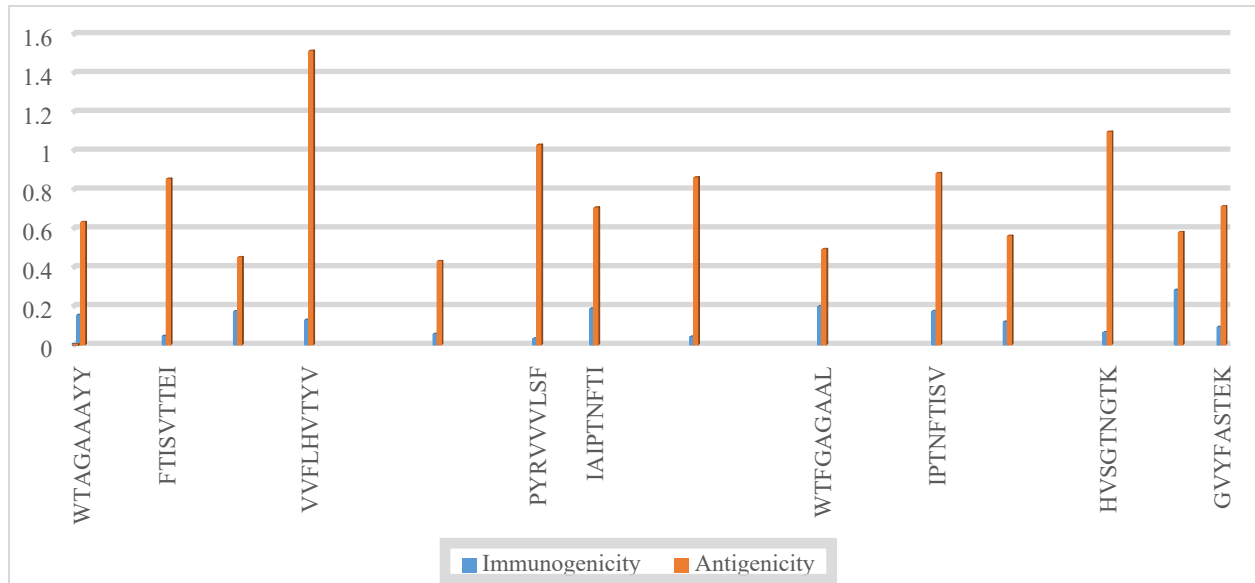

**Figure S4:** Allergenicity assessment of the final multi-epitope vaccine. The vaccine was found to be non-allergen by (A) AllerTOP v2.0 and (B) Allergen FP v1.0 sever

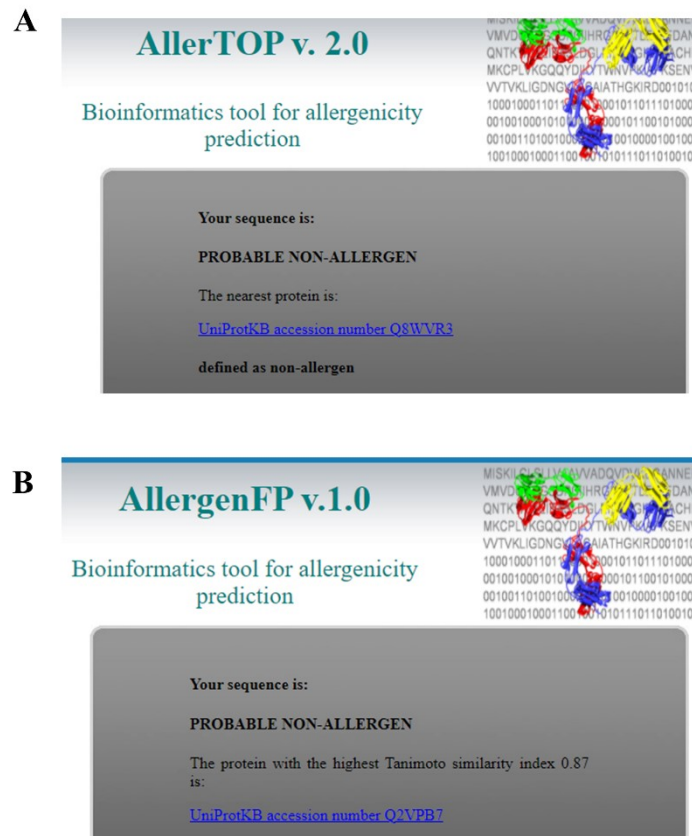

**Figure S5:** Signal Peptide prediction in the vaccine constructs

# Measure Position Value

max. C 19 0.107

max. Y 70 0.106

max. S 60 0.111

mean S 1-69 0.097

D 1-69 0.101 0.450 NO

Name=vaccine SP='NO' D=0.101 D-cutoff=0.450 Networks=SignalP-noTM

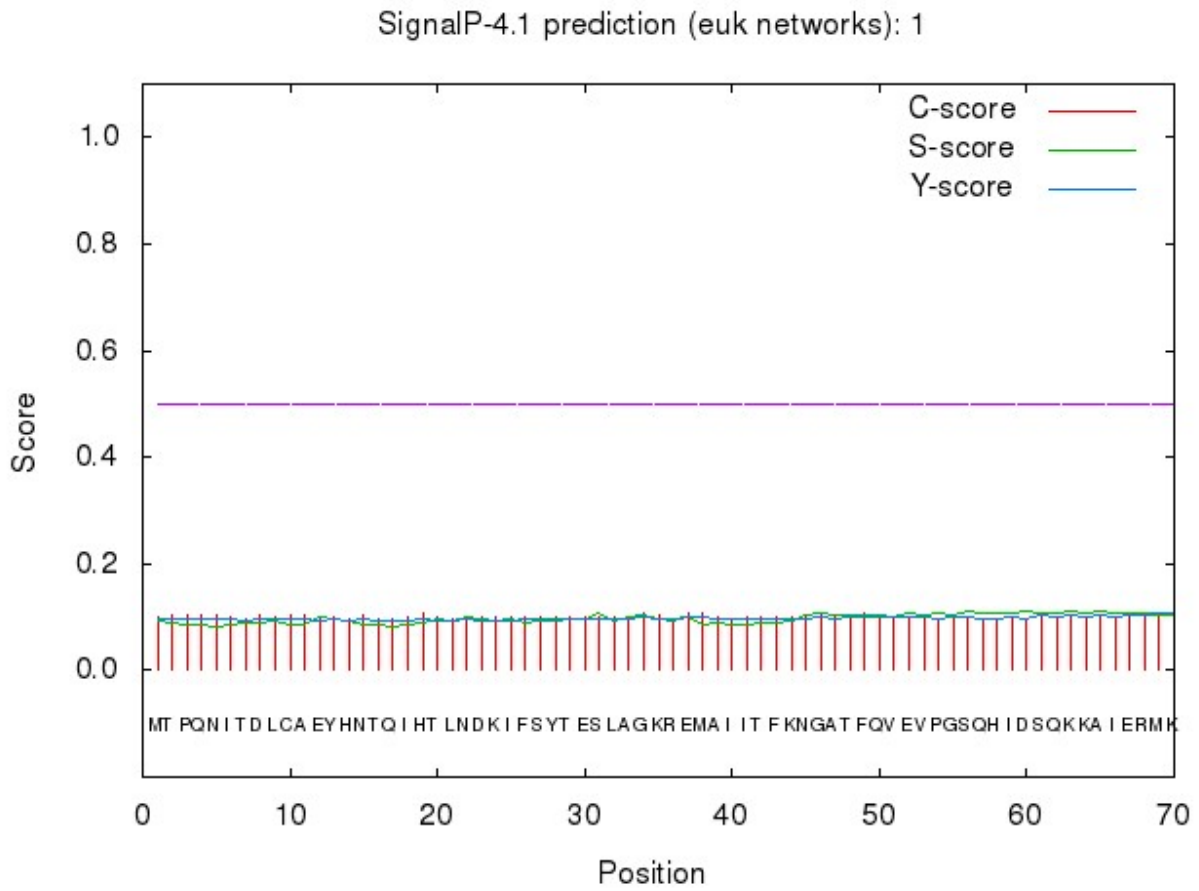

**Figure S6: B Cell Epitopes**

Continuous Epitopes, predicted by ElliPro and visualized using PyMol. Epitopes are shown in green color and the vaccine is shown in hot red color

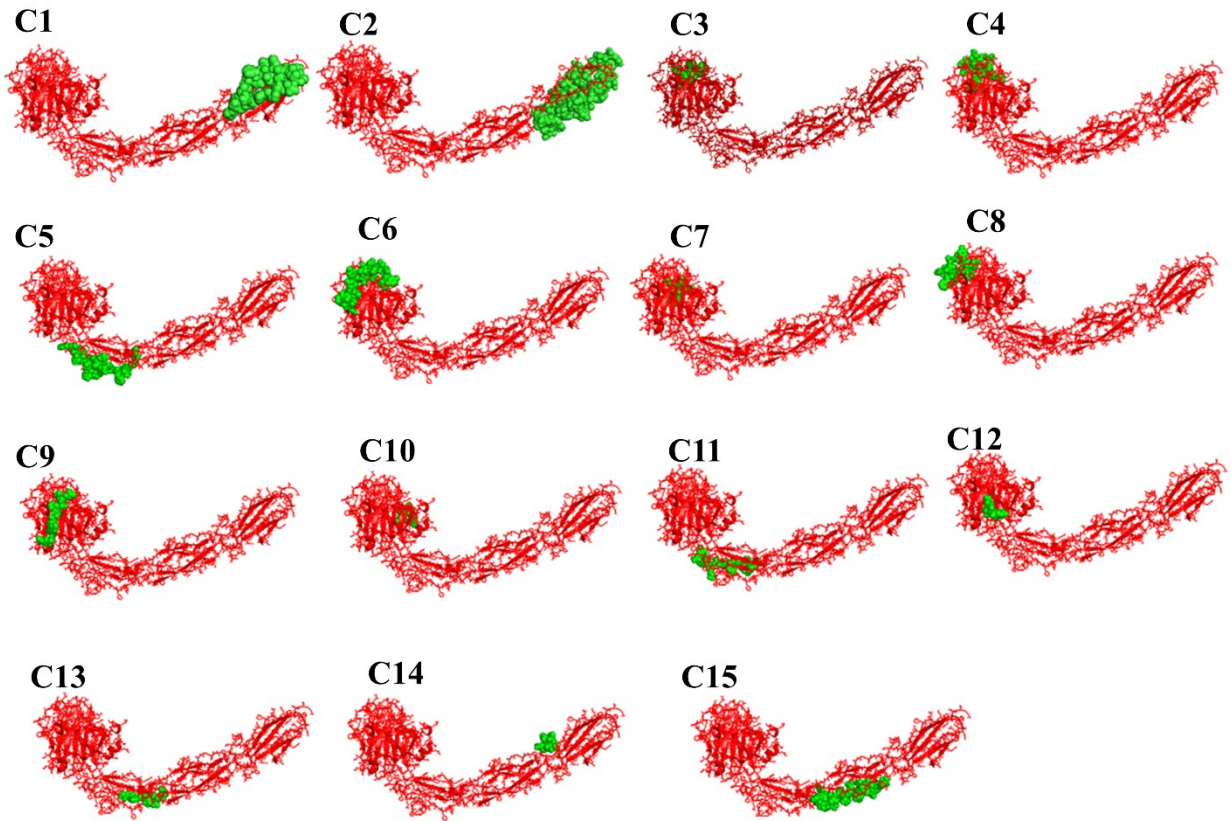

**Figure S7: B Cell Epitopes**

Discontinuous Epitopes predicted by ElliPro and visualized using PyMol. Epitopes are shown in blue color and the vaccine is shown in red color

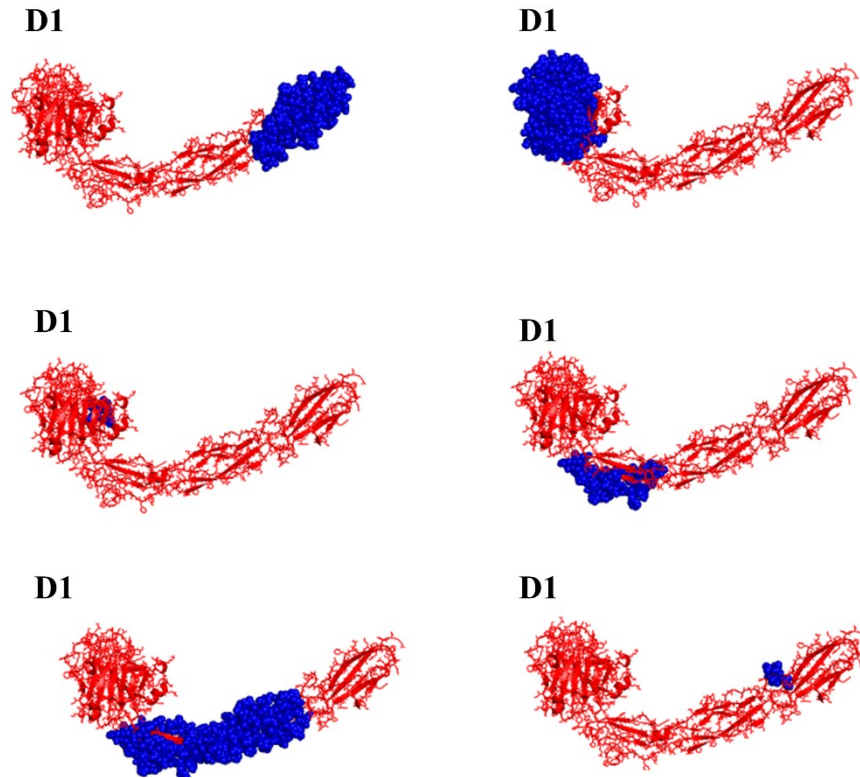

**Figure S8:** (A) changes in Structure conformations of vaccine (vaccine-TLR-2) between 0 and 50 ns, and (B) changes in Structure conformations of Chain B of TLR-2 (vaccine-TLR-2) between 0 and 50 ns.

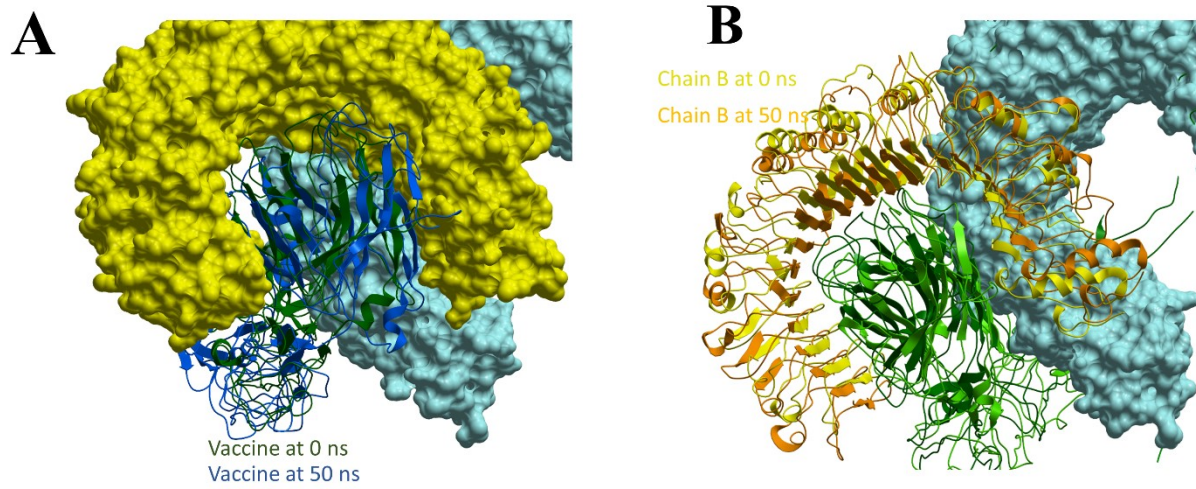

**Figure S9:** In silico immune simulation of vaccine construct. (A) Plasma B lymphocytes count sub-divided per isotype (IgM, IgG1, and IgG2). (B) B lymphocytes population per entity-state, (C) CD4 T-helper lymphocytes count. The plot shows total and memory counts, (D) CD4 T-regulatory lymphocytes count, (E) CD8 T-cytotoxic lymphocytes count, (F) Natural Killer cells (total count), (G) Macrophages. Total count, internalized, presenting on MHC class-II, active and resting macrophages, (H) Epithelial cells. Total count is broken down to active, pathogen-infected, and presenting on class-I MHC molecule, (I) Dendritic cells. DC can present antigenic peptides on both MHC class-I and class-II molecules. The curves show the total number broken down into active, resting, internalized, and presenting the ag.

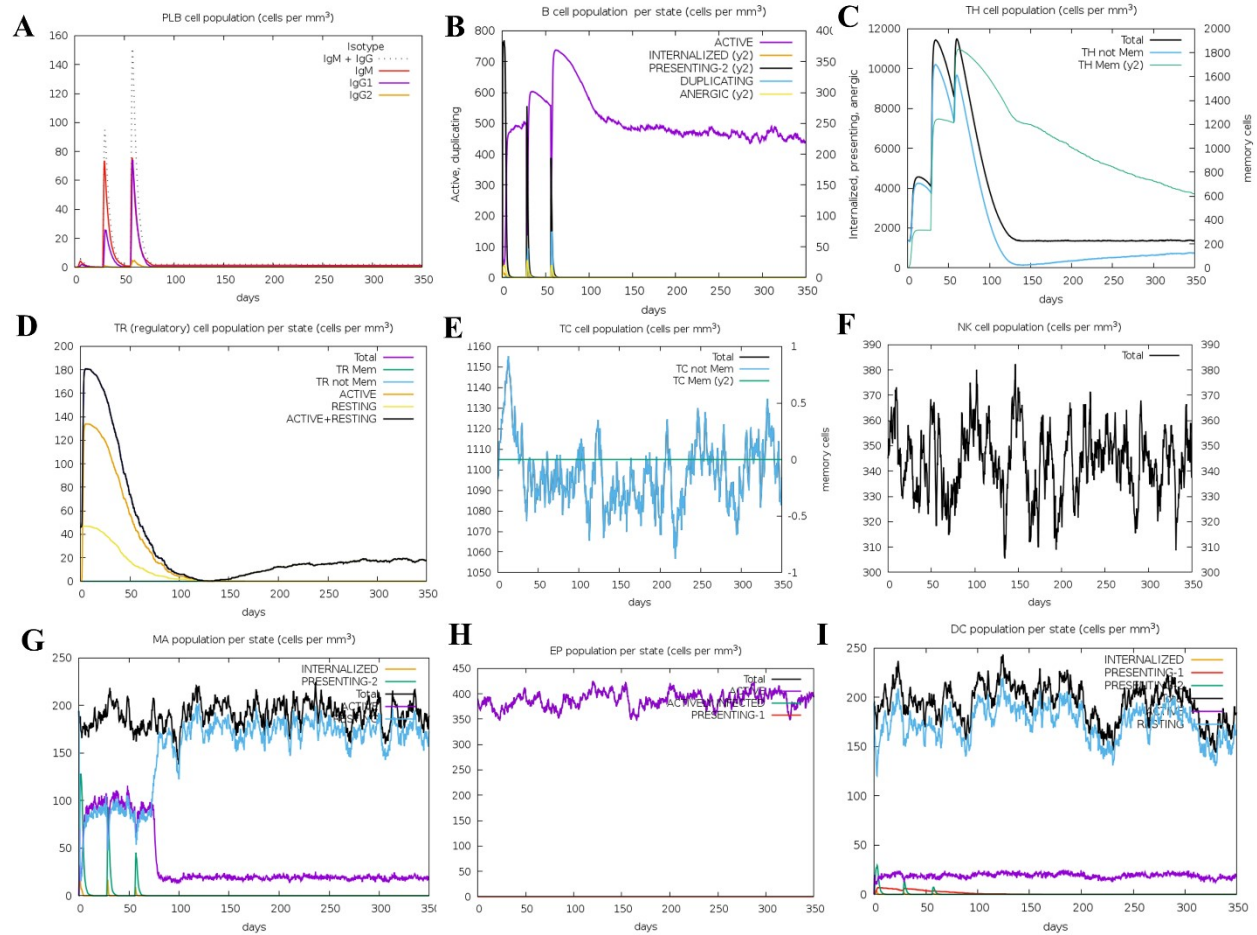

Supplement: d1ra06532g1.pdf [file d1ra06532g1.pdf]
